# Supplementary material for: Integrative Genomic Profiling Uncovers Therapeutic Targets of Acral Melanoma in Asian Populations
Source: PubMed Central journal article supplement — Clin Cancer Res. 2022 Mar 16;28(12):2690–703. doi: 10.1158/1078-0432.CCR-21-3344 (PMC9359751; doi:10.1158/1078-0432.ccr-21-3344), 2022-03-16
Supplement: ccr-21-3344_supplementary_figure_2_suppfs2.pdf [file ccr-21-3344_supplementary_figure_2_suppfs2.pdf]

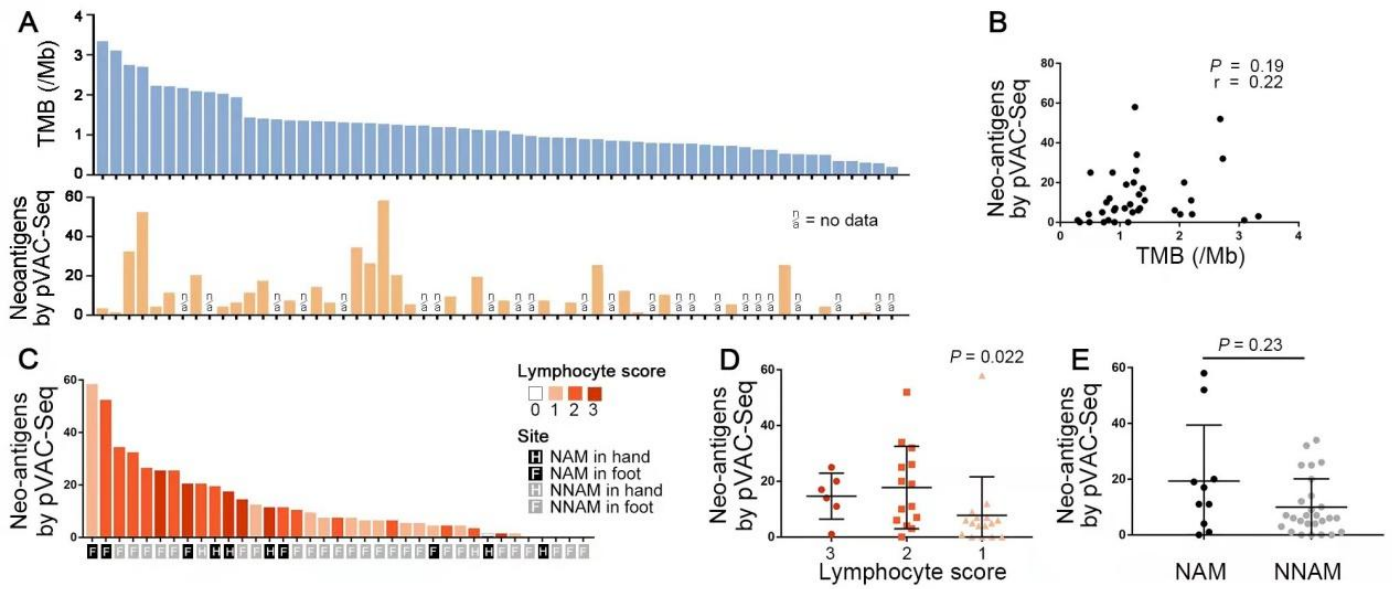

**Fig. S2: The association between the neo-antigen load and the mutation burden, lymphocyte score and the primary site in the discovery cohort.** (A) The mutation burden (TMB) (upper) and the neo-antigen load analyzed by pVAC-Seq (lower) for each sample. The results of pVAC-Seq were from 37 samples with both WES and RNA-seq data. (B) The correlation of TMB and neo-antigen load analyzed by pVAC-Seq. (C) The neo-antigens by pVAC-Seq and the lymphocyte scores in each sample (N = 37). (D) The differences of neo-antigen load by pVAC-Seq between subsets of samples with different lymphocyte scores. (E) The difference of neo-antigen load by pVAC-Seq between NAM and NNAM.
