# Supplementary material for: Integrative Genomic Profiling Uncovers Therapeutic Targets of Acral Melanoma in Asian Populations
Source: PubMed Central journal article supplement — Clin Cancer Res. 2022 Mar 16;28(12):2690–703. doi: 10.1158/1078-0432.CCR-21-3344 (PMC9359751; doi:10.1158/1078-0432.ccr-21-3344), 2022-03-16
Supplement: ccr-21-3344_supplementary_figure_4_suppfs4.pdf [file ccr-21-3344_supplementary_figure_4_suppfs4.pdf]

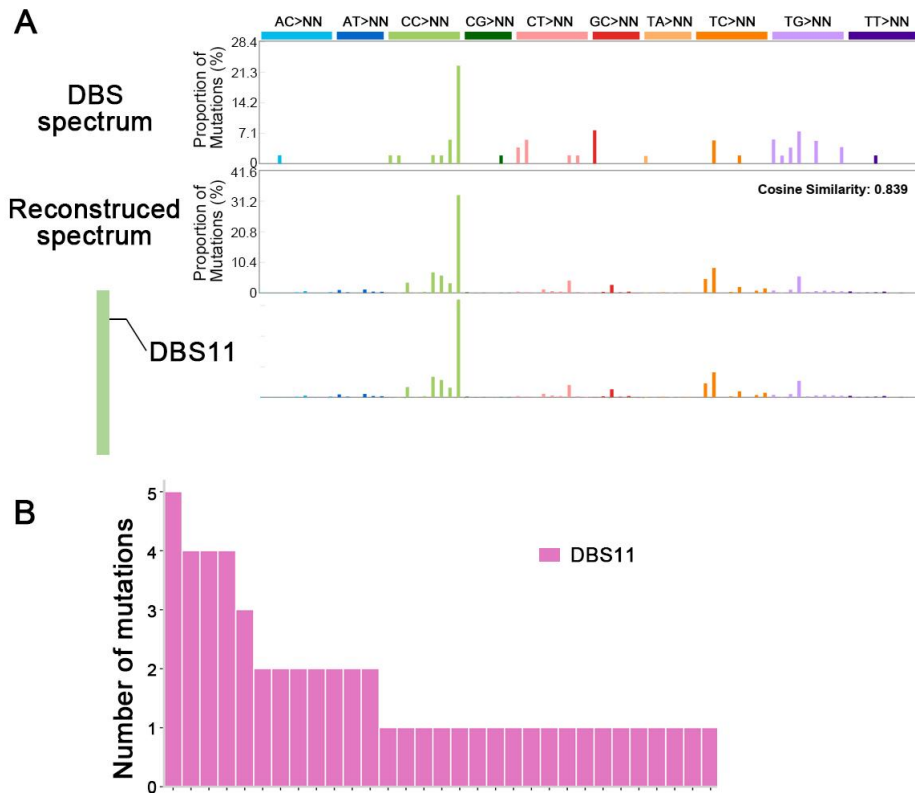

**Fig. S4. The DBS signatures extracted from the acral melanoma samples in the discovery cohort. (A)** The DBS spectrum and extracted DBS signature were shown and DBS11 was the only signature we extracted from the samples. **(B)** The number of mutations contributed by DBS11 in each sample.
