# Supplementary material for: Integrative Genomic Profiling Uncovers Therapeutic Targets of Acral Melanoma in Asian Populations
Source: PubMed Central journal article supplement — Clin Cancer Res. 2022 Mar 16;28(12):2690–703. doi: 10.1158/1078-0432.CCR-21-3344 (PMC9359751; doi:10.1158/1078-0432.ccr-21-3344), 2022-03-16
Supplement: ccr-21-3344_supplementary_figure_5_suppfs5.pdf [file ccr-21-3344_supplementary_figure_5_suppfs5.pdf]

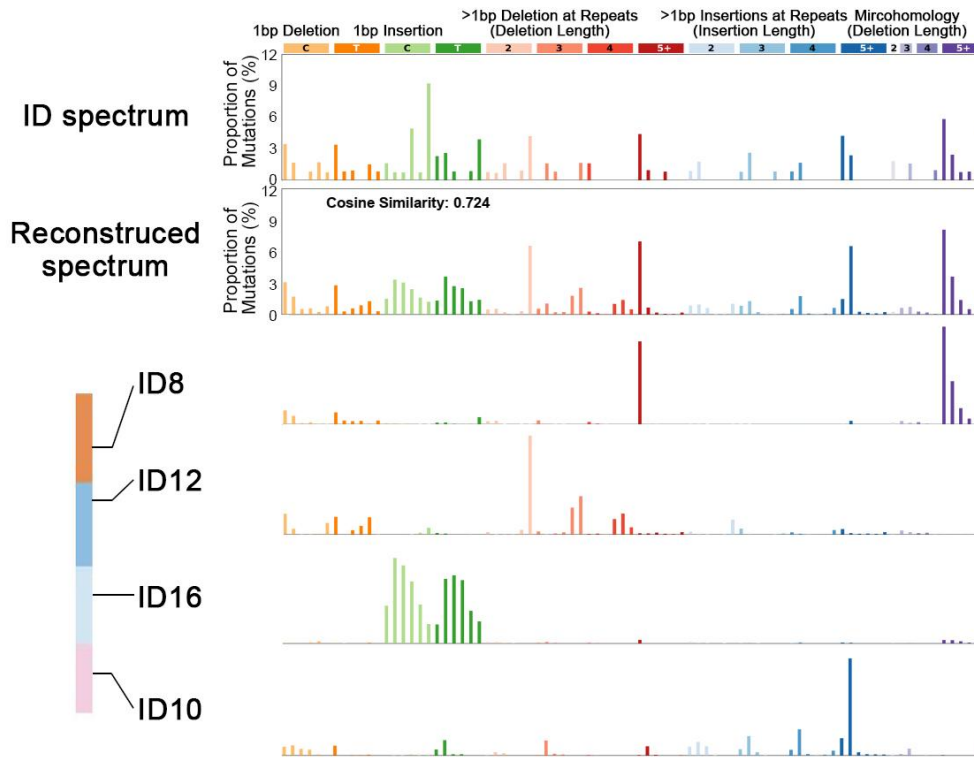

**Fig. S5.** The ID signatures extracted from the acral melanoma samples in the discovery cohort. We extracted four ID signatures, which was marked by different colors in the percent bar chart. The length of the bar represents the percentage of the signature in the spectrum.
