# Supplementary material for: Integrative Genomic Profiling Uncovers Therapeutic Targets of Acral Melanoma in Asian Populations
Source: PubMed Central journal article supplement — Clin Cancer Res. 2022 Mar 16;28(12):2690–703. doi: 10.1158/1078-0432.CCR-21-3344 (PMC9359751; doi:10.1158/1078-0432.ccr-21-3344), 2022-03-16
Supplement: ccr-21-3344_supplementary_figure_6_suppfs6.pdf [file ccr-21-3344_supplementary_figure_6_suppfs6.pdf]

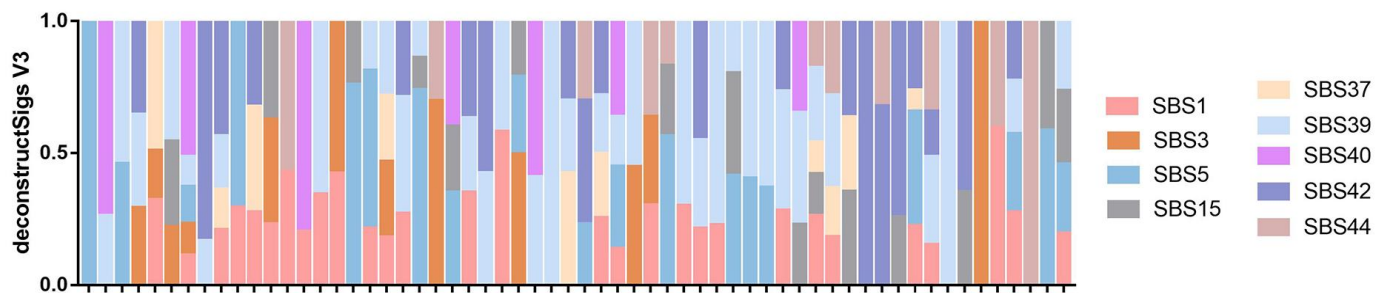

**Fig. S6. The relative contribution of mutation signatures analyzed by deconstructSigs.** The results were assigned to COSMIC V3.2. Signatures were differentiated by colors.
