# Supplementary material for: Integrative Genomic Profiling Uncovers Therapeutic Targets of Acral Melanoma in Asian Populations
Source: PubMed Central journal article supplement — Clin Cancer Res. 2022 Mar 16;28(12):2690–703. doi: 10.1158/1078-0432.CCR-21-3344 (PMC9359751; doi:10.1158/1078-0432.ccr-21-3344), 2022-03-16
Supplement: ccr-21-3344_supplementary_figure_7_suppfs7.pdf [file ccr-21-3344_supplementary_figure_7_suppfs7.pdf]

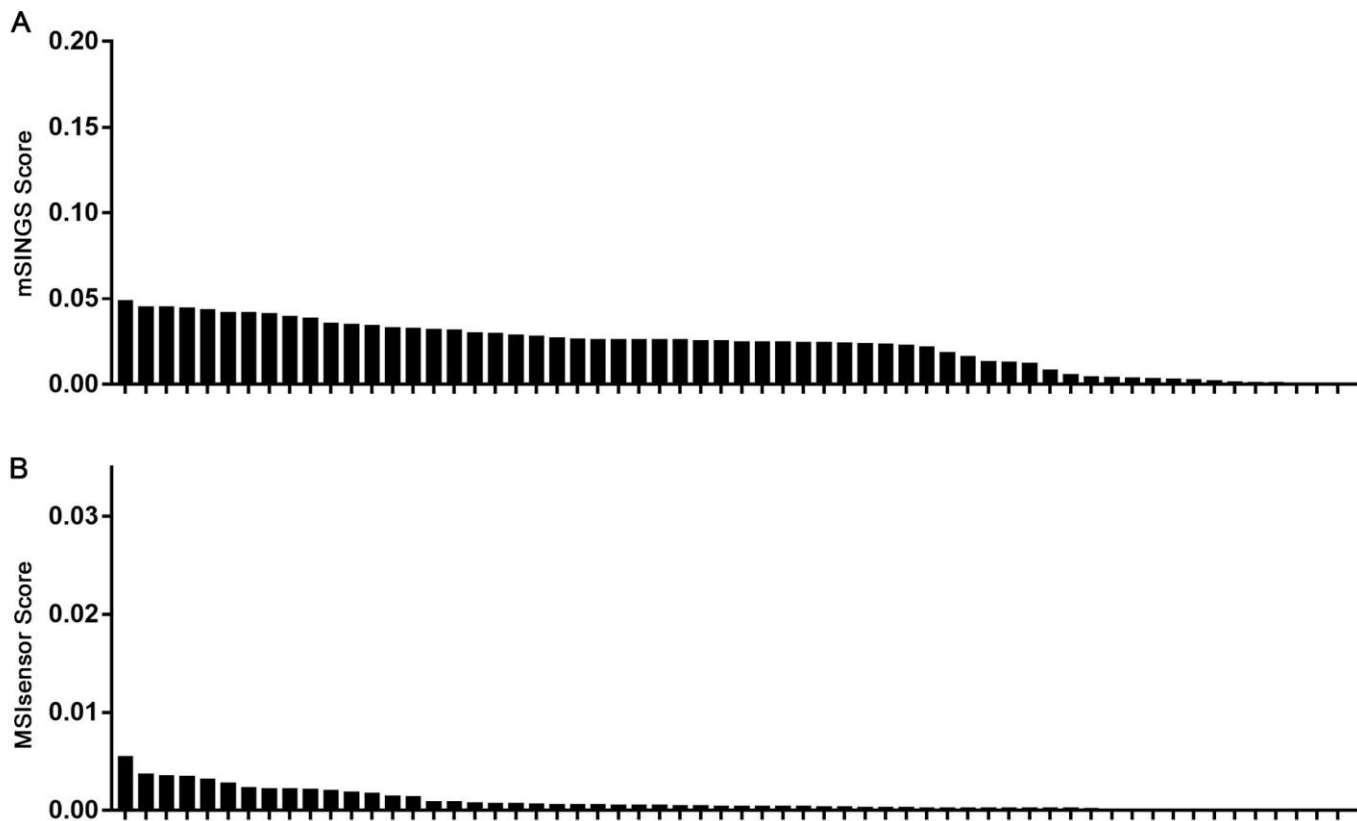

**Fig. S7. Fraction of unstable microsatellite loci identified by NGS predicts MSI status.** (A) The MSI assessed by mSINGS. And the cutoff of mSINGS score was 0.2. (B) The MSI assessed by MSIsensor. And the cutoff of MSIsensor score was 0.035.
