# Supplementary material for: Integrative Genomic Profiling Uncovers Therapeutic Targets of Acral Melanoma in Asian Populations
Source: PubMed Central journal article supplement — Clin Cancer Res. 2022 Mar 16;28(12):2690–703. doi: 10.1158/1078-0432.CCR-21-3344 (PMC9359751; doi:10.1158/1078-0432.ccr-21-3344), 2022-03-16
Supplement: ccr-21-3344_supplementary_figure_9_suppfs9.pdf [file ccr-21-3344_supplementary_figure_9_suppfs9.pdf]

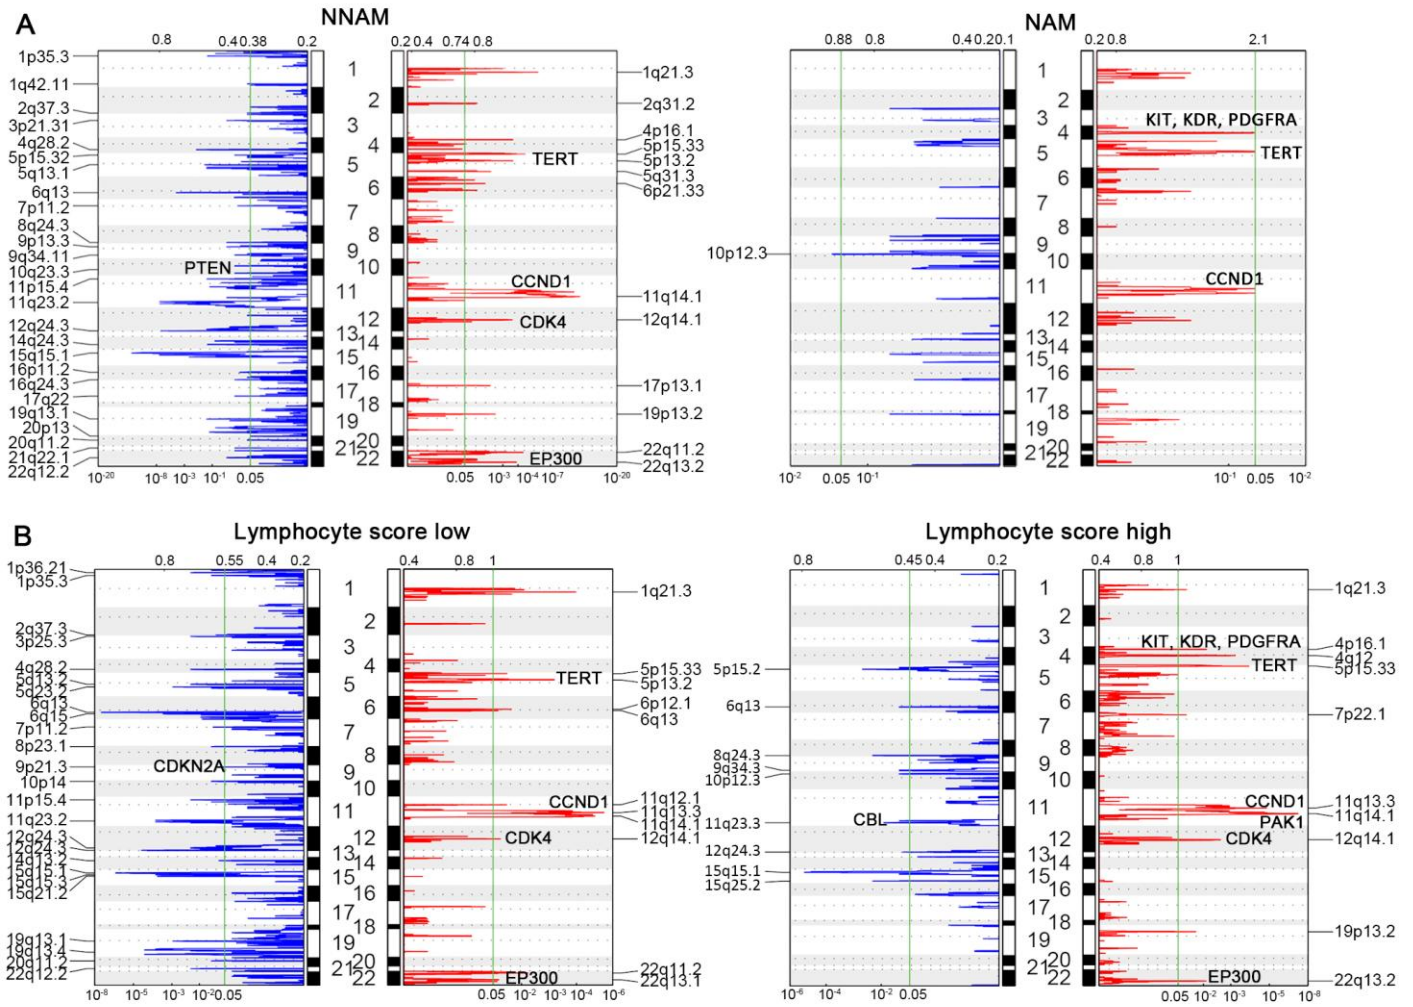

**Fig. S9. Significant regions of recurrent copy number aberrations in different groups.** (A) The GISTIC analysis of significant regions of recurrent copy number change in melanomas from different primary sites (NAM and NNAM). (B) The comparison of significant regions of recurrent copy number change in samples with low and high lymphocyte scores.
