# Supplementary material for: Integrative Genomic Profiling Uncovers Therapeutic Targets of Acral Melanoma in Asian Populations
Source: PubMed Central journal article supplement — Clin Cancer Res. 2022 Mar 16;28(12):2690–703. doi: 10.1158/1078-0432.CCR-21-3344 (PMC9359751; doi:10.1158/1078-0432.ccr-21-3344), 2022-03-16
Supplement: ccr-21-3344_supplementary_figure_10_suppfs10.pdf [file ccr-21-3344_supplementary_figure_10_suppfs10.pdf]

### EP300 CNV Distribution

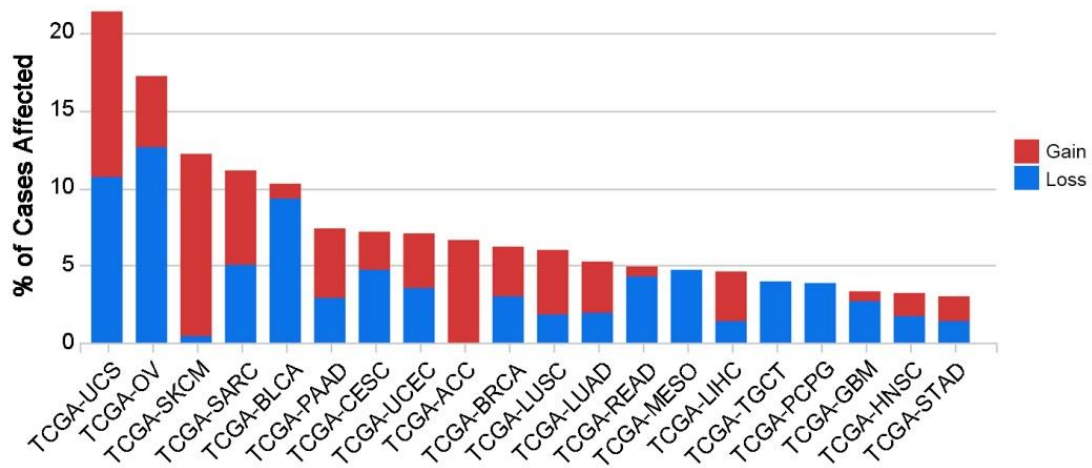

**Fig. S10. Proportions of cases affected by EP300 CNV in different cancer types by data from TCGA.**

Abbreviations: UCS (Uterine Carcinosarcoma); OV (Ovarian serous cystadenocarcinoma); SKCM (Skin Cutaneous Melanoma); SARC (Sarcoma); BLCA (Bladder Urothelial Carcinoma); PAAD (Pancreatic adenocarcinoma); CESC (Cervical squamous cell carcinoma and endocervical adenocarcinoma); UCEC (Uterine Corpus Endometrial Carcinoma); ACC (Adrenocortical carcinoma); BRCA (Breast invasive carcinoma); LUSC (Lung squamous cell carcinoma); LUAD (Lung adenocarcinoma); READ (Rectum adenocarcinoma); MESO (Mesothelioma); LIHC (Liver hepatocellular carcinoma); TGCT (Testicular Germ Cell Tumors); PCPG (Pheochromocytoma and Paraganglioma); GBM (Glioblastoma multiforme); HNSC (Head and Neck squamous cell carcinoma); STAD (Stomach adenocarcinoma).
