# Supplementary material for: Integrative Genomic Profiling Uncovers Therapeutic Targets of Acral Melanoma in Asian Populations
Source: PubMed Central journal article supplement — Clin Cancer Res. 2022 Mar 16;28(12):2690–703. doi: 10.1158/1078-0432.CCR-21-3344 (PMC9359751; doi:10.1158/1078-0432.ccr-21-3344), 2022-03-16
Supplement: ccr-21-3344_supplementary_figure_12_suppfs12.pdf [file ccr-21-3344_supplementary_figure_12_suppfs12.pdf]

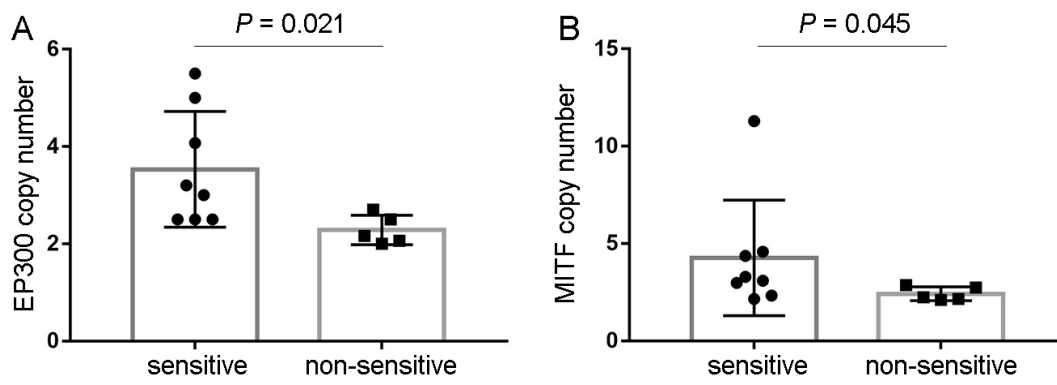

**Fig. S12. The difference of gene copy numbers in sensitive and non-sensitive melanoma cell lines to A-485.** The copy numbers of *EP300* (A) and *MITF* (B) were significantly higher in sensitive cell lines ( $IC_{50}$  to A-485  $< 10 \mu M$ ) than non-sensitive cell lines ( $IC_{50}$  to A-485  $> 10 \mu M$ ).
