# Supplementary material for: Integrative Genomic Profiling Uncovers Therapeutic Targets of Acral Melanoma in Asian Populations
Source: PubMed Central journal article supplement — Clin Cancer Res. 2022 Mar 16;28(12):2690–703. doi: 10.1158/1078-0432.CCR-21-3344 (PMC9359751; doi:10.1158/1078-0432.ccr-21-3344), 2022-03-16
Supplement: ccr-21-3344_supplementary_figure_14_suppfs14.pdf [file ccr-21-3344_supplementary_figure_14_suppfs14.pdf]

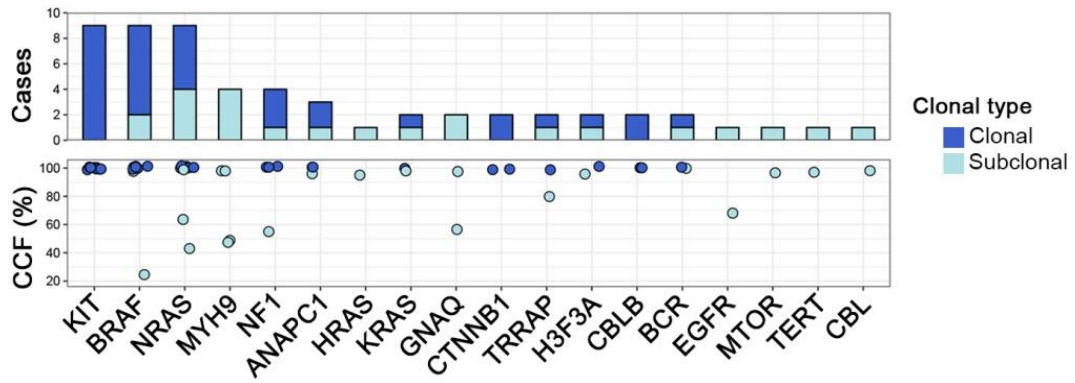

**Fig. S14. Graphical representation of distribution of the CCF for acral melanoma driver SNVs.**

Mutations were classified as clonal (dark blue) or subclonal (light blue). Each dot corresponds to the mutation of one patient.
