# Supplementary figures and images for: Integrative Genomic Profiling Uncovers Therapeutic Targets of Acral Melanoma in Asian Populations
Source: PubMed Central journal article supplement — Clin Cancer Res. 2022 Mar 16;28(12):2690–703. doi: 10.1158/1078-0432.CCR-21-3344 (PMC9359751; doi:10.1158/1078-0432.ccr-21-3344), 2022-03-16

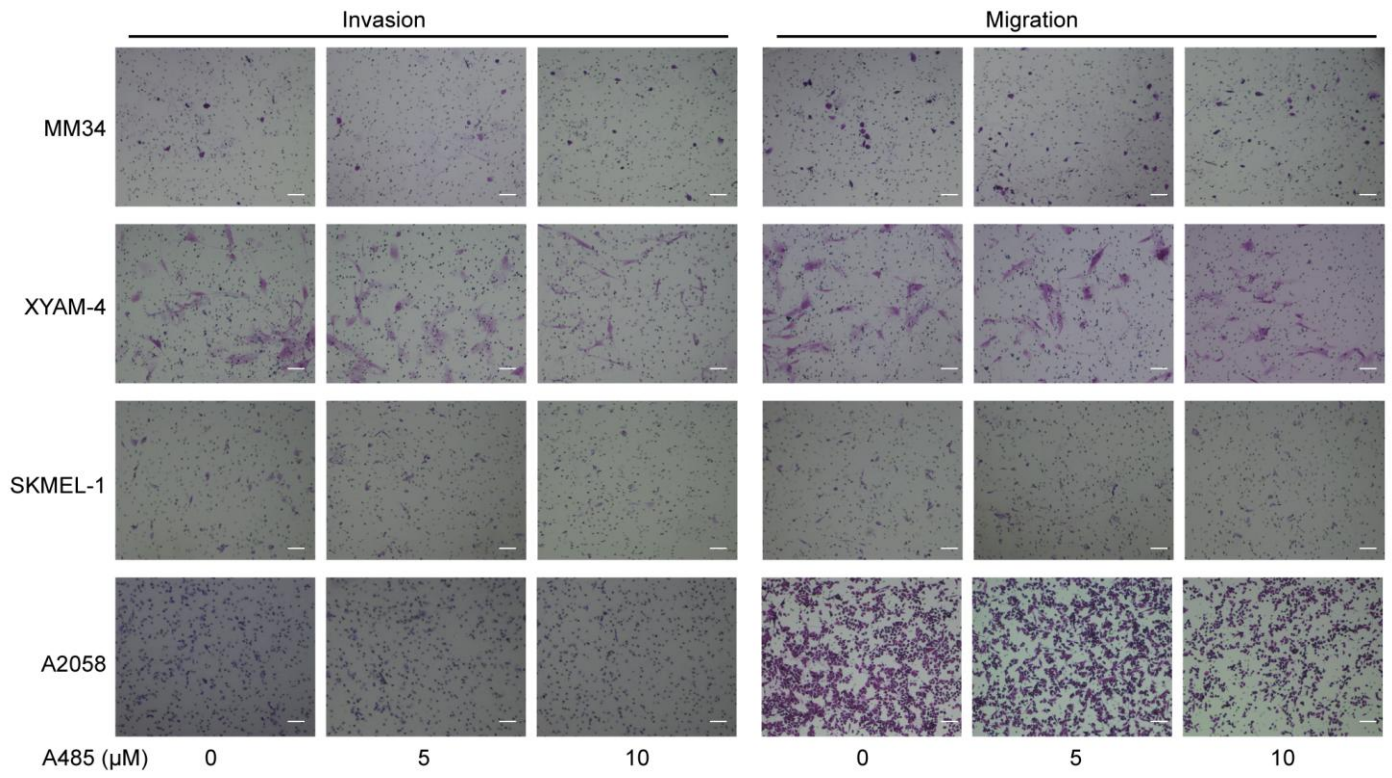

**Fig. S13. The Transwell invasion and migration assay of melanoma cell lines.** The bar represents 100 μm.

Supplement: ccr-21-3344_supplementary_figure_13_suppfs13.pdf [file ccr-21-3344_supplementary_figure_13_suppfs13.pdf]
